# Supplementary material for: Enteroendocrine cell types that drive food reward and aversion
Source: eLife. 2022 Aug 1;11:e74964. doi: 10.7554/eLife.74964 (PMC9363118; doi:10.7554/eLife.74964)
Supplement: Figure 1—source data 1. [file elife-74964-fig1-data1.xlsx]

## Sheet: Figure 1d
	# of cells of each type in each study
	Pulse Chase (Gerhart et al)	Lineage Trace (this study)	Combined
EC.1	324	72	396
EC.2	270	716	986
EEC.EC	0	148	148
EEC.I	116	617	733
EEC.NL	170	333	503
EEC.K	204	122	326
EEC.X	80	115	195
EEC.D	80	45	125
Prog	611	4	615
Ent.1	284	365	649
Ent.2	36	699	735
Gob.1	115	661	776
Gob.2	19	2653	2672
Paneth	15	210	225
Tuft	13	241	254
