# Supplementary material for: Enteroendocrine cell types that drive food reward and aversion
Source: eLife. 2022 Aug 1;11:e74964. doi: 10.7554/eLife.74964 (PMC9363118; doi:10.7554/eLife.74964)
Supplement: Figure 3—figure supplement 2—source data 1. [file elife-74964-fig3-figsupp2-data1.xlsx]

## Sheet: Cre-line Density
	Villus	Villus	Villus	Villus	Villus	Villus			Crypt	Crypt	Crypt	Crypt	Crypt	Crypt
Fev-Cre	351.3	425.2							284.31	272.37
Tac1-Cre	225.1	287.12	288.24	276.23	209.74				224.79	234.93	191.12	240.82	189.34
Cck-Cre	93.82	266.97	101.04	86.79	194.49	156.88			57.1	285.09	71.36	52.96	115.01	102.4
Gcg-Cre	102.88	51.06	68.78	88.56					90.22	48.67	58.04	103.04
Sst-Cre	44.14	39.52	41.77	35.63					13.36	14.84	22.85	28.02
