# Supplementary material for: Enteroendocrine cell types that drive food reward and aversion
Source: eLife. 2022 Aug 1;11:e74964. doi: 10.7554/eLife.74964 (PMC9363118; doi:10.7554/eLife.74964)
Supplement: Figure 3—source data 1. [file elife-74964-fig3-data1.xlsx]

## Sheet: Fev-Cre_Marker
	Villus	Villus	Villus
5HT	88.54	87.2	97.64
SubP	92.48	100
PYY	96.06	98.41
CCK	89.47	94.21
Glp1	73.85	98.39
Gip	85.71	92.59
SST	84.21	100
	Crypt	Crypt	Crypt
5HT	73.6	70.09	90.96
SubP	79.47	95.51
PYY	98.72	97.87
CCK	89.47	100
Glp1	51.11	97.56
Gip	100	95
SST	73.91	92.86

## Sheet: Tac1-Cre_Marker
	Villus	Villus	Villus	Villus	Villus	Villus
5HT	73.54	73.09	75.89	80.51	83.4	76.67
SubP	79.2	81.15	100	100
PYY	87.46	89.11	93.64	88.57	94.71
CCK	0	0	0	1.35	1.19	0
Glp1	0	0	0	0	0
Gip	6.06	0	4.92	0	5.77
SST	4	10	2.7	0	0
	Crypt	Crypt	Crypt	Crypt	Crypt	Crypt
5HT	54.07	75.68	77.09	81.97	83.58	91.96
SubP	88.13	78.48	100	98.08	94.44
PYY	89.63	84.21	92.78	92.31	96.15
CCK	0	23.91	1.33	0	1.25	0
Glp1	0	0	0	0	0
Gip	2.86	0	0	0	5.56
SST	4.17	0	0	0	5.56

## Sheet: CCK-Cre_Marker
	Villus	Villus	Villus	Villus	Villus	Villus
5HT	10.8	29.46	9.95	17.93	9.91	19.17
SubP	16.67	4.76	0	0	0	39.22
PYY	17.95	37.37	39.39		25.71	90.77
CCK	95.24	100	92.45		98.1	85
Glp1	80.77	89.29	76.92
Gip	66.67	100	67.5		71.43	100
SST	0	9.52	0	0	0	0
	Crypt	Crypt	Crypt	Crypt	Crypt	Crypt
5HT	2.83	15.68	5.1	0	2.98	12.63
SubP	1.72	8.19	0	0	0	15.65
PYY	64.29	62.75	66.67		36.36	65
CCK	92.06	100	80.77		89.33	66.13
Glp1	55.88	64.29	45.16
Gip	75	87.96	47.83		77.42
SST	3.23	4.29	2	0	0	0

## Sheet: Gcg-Cre_Marker
	Villus	Villus	Villus	Villus	Villus
5HT	6.97	3.48	2.93	2.49	2.28
SubP	0	0	0	0	0
PYY	28.63	10	20.51	45.45	15.18
CCK	59.02	27.89	36.36	13.9	33.33
Glp1	46.88	75.47	72.41
Gip	16.67	18.84	22.22	20.93	14.29
SST	0	0	0	0	0
	Crypt	Crypt	Crypt	Crypt	Crypt
5HT	3.03	1	0.36	0	6.07
SubP	0	0	0	0	0
PYY	29.35	66.67	9.09	15.79	14.94
CCK	61.04	32.93	41.54	14.07	34.33
Glp1	52.24	39.53	70.37
Gip	3.85	6.9	5.41	10.71	2.17
SST	0	0	0	0	0

## Sheet: SST-Cre_Marker
	Villus	Villus	Villus	Villus	Villus
5HT	0	0	0.25	0.32
SubP	0	0	0	0
PYY	0.96	0	6.38	3.13
CCK	0	0	2.16	0
Glp1	0	0	0	0	0
Gip	0	1.25	2.99	2.56
SST	93.42	82.54	88.24	82.54
	Crypt	Crypt	Crypt	Crypt	Crypt
5HT	0	0.32	0	0
SubP	0	0	0	0
PYY	0	0	0	0
CCK	0	0	0	0
Glp1	0	0	0	0	0
Gip	0	0	0	0
SST	25.76	44.83	36.11	35.85

## Sheet: Marker_Fev-Cre
	Villus	Villus	Villus
5HT	68.81	77.3	68
SubP	13.48	8.1
PYY	65.59	52.89
CCK	43.59	23.8
Glp1	17.78	9.43
Gip	13.82	8.83
SST	11.47	8.61
	Crypt	Crypt	Crypt
5HT	66.16	75.93	58.33
SubP	67.8	52.96
PYY	39.9	15.54
CCK	39.77	20.73
Glp1	12.85	10.53
Gip	9.6	5.15
SST	9.29	8.41

## Sheet: Marker_Tac1-Cre
	Villus	Villus	Villus	Villus	Villus	Villus
5HT	90.11	99.39	99.28	99.38	98.56	99.46
SubP	2.13	13.82	8.7	2.48	0
PYY	69.12	97.83	83.08	72.09	82.56
CCK	0	0	0	0.78	0.42	0
Glp1	0	0	0	0	0
Gip	1.13	0	0.94	0	1.57
SST	0.6	1.69	0.46	0	0
	Crypt	Crypt	Crypt	Crypt	Crypt	Crypt
5HT	81.58	99.29	99.53	98.98	100	99.46
SubP	62.95	94.42	70.71	56.98	73.38
PYY	56.69	92.9	65.22	58.33	53.57
CCK	0	6.29	0.64	0	0.66	0
Glp1	0	0	0	0	0
Gip	0.46	0	0	0	1.14
SST	0.51	0	0	0	1.16

## Sheet: Marker_CCK-Cre
	Villus	Villus	Villus	Villus	Villus	Villus
5HT	44.93	62.26	39.22	47.27	37.5	23.23
SubP	4.4	0.32	0	0	0	12.35
PYY	20.59	36.39	26		16.82	60.82
CCK	83.33	52.43	72.59		72.77	57.26
Glp1	38.89	29.76	38.46
Gip	32.97	21.68	25.23		26.6	1.63
SST	0	7.74	0	0	0	0
	Crypt	Crypt	Crypt	Crypt	Crypt	Crypt
5HT	13.73	20.45	22.73	0	25	32.89
SubP	6.56	10.28	0	0	0	29.03
PYY	21.43	9.22	20		16.44	38.24
CCK	69.88	46.62	54.78		62.62	24.4
Glp1	35.19	38.3	42.42
Gip	21.43	23.75	13.25		26.67	0
SST	1.75	8.31	0	0	0	0

## Sheet: Marker_Gcg-Cre
	Villus	Villus	Villus	Villus	Villus
5HT	23.53	45.1	33.33	18.18	19.15
SubP	0	0	0	0	0
PYY	61.32	25.81	53.33	37.5	19.54
CCK	77.14	100	100	54.11	18.1
Glp1	35.71	65.57	56.76
Gip	14.42	22.81	20.34	16.36	7.59
SST	0	0	0	0	0
	Crypt	Crypt	Crypt	Crypt	Crypt
5HT	10.34	13.89	2.78	0	25.66
SubP	0	0	0	0	0
PYY	25.71	27.78	11.76	9.09	13.68
CCK	59.12	88.71	100	41.14	10.36
Glp1	72.92	60.71	63.33
Gip	2.17	10.53	5.88	11.54	1.75
SST	0	0	0	0	0

## Sheet: Marker_SST-Cre
	Villus	Villus	Villus	Villus	Villus
5HT	0	0	3.7	4.35
SubP	0	0	0	0
PYY	3.7	0	30	10
CCK	0	0	10.71	0
Glp1	0	0	0	0	0
Gip	0	3.33	8.7	6.45
SST	88.75	81.25	83.33	92.86
	Crypt	Crypt	Crypt	Crypt	Crypt
5HT	0	12.5	0	0
SubP	0	0	0	0
PYY	0	0	0	0
CCK	0	0	0	0
Glp1	0	0	0	0	0
Gip	0	0	0	0
SST	65.38	70.27	38.24	59.38
