# Supplementary material for: Enteroendocrine cell types that drive food reward and aversion
Source: eLife. 2022 Aug 1;11:e74964. doi: 10.7554/eLife.74964 (PMC9363118; doi:10.7554/eLife.74964)
Supplement: Figure 4—source data 1. [file elife-74964-fig4-data1.xlsx]

## Sheet: Figure 3C
								Food intake (g) over 60 min after injection of saline; each cell is a different mouse
Genotype	Saline	Saline	Saline	Saline	Saline	Saline	Saline	Saline	Saline	Saline	Saline	Saline	Saline	Saline	Saline	Saline	Saline	Saline	Saline	Saline	Saline	Saline	Saline	Saline
Fev-Exp	1.08	1.11	0.78	0.88	0.62	0.76	1.22	0.65	0.51
Fev-Ctrl	1.11	1.02	0.78	0.36	0.52	0.8	0.58	0.96	0.92	0.73	0.98	0.46	0.7
Tac1-Exp	0.57	0.56	0.78	0.75	0.7	1.1	0.86	0.53	0.6	0.74
Tac1-Ctrl	0.75	0.8	0.49	0.75	0.75	0.37	0.72	0.46	0.96	1	0.66	0.7	0.92
CCK-Exp	0.58	0.71	0.5	0.45	0.91	1.01	0.71	0.75	0.8	0.94	1.09	0.62	1	1
CCK-Ctrl	0.57	0.53	0.42	0.75	0.8	0.54	0.46	0.68	0.92	1.02	0.91	0.82	1	0.82	0.88	1.04	0.64	0.73	0.78
GCG-Exp	0.78	0.67	0.56	0.6	1.15	0.84	0.59	0.7	0.77	0.73	0.72	0.91	0.84	0.56	0.74	0.84	0.67	0.75	0.57	0.71	0.58	1.08	0.74
GCG-Ctrl	0.63	0.81	0.46	0.33	0.64	0.77	0.71	0.77	0.51	0.79	0.87	0.76	0.86	0.77	1.08	0.72	0.84	0.62	0.47	0.62	0.62	0.5	0.75	0.7
SST-Exp	0.85	0.66	0.68	0.58	0.73
SST-Ctrl	0.47	0.66	0.69	0.73	1.05
Ghrl-Exp	0.49	0.57	0.51	0.59	0.65	0.77	1.03	0.83	0.58	0.88	1.03
Ghrl-Ctrl	1.13	0.58	0.71	0.62
								Food intake (g) over 60 min after injection of CNO; each cell is a different mouse
Genotype	CNO	CNO	CNO	CNO	CNO	CNO	CNO	CNO	CNO	CNO	CNO	CNO	CNO	CNO	CNO	CNO	CNO	CNO	CNO	CNO	CNO	CNO	CNO	CNO
Fev-Exp	0.95	0.88	1	0.46	0.38	1	0.63	0.2	0.3
Fev-Ctrl	0.67	0.96	0.56	0.28	0.52	0.9	0.76	0.78	0.81	0.75	0.96	0.76	0.78
Tac1-Exp	0.21	0.53	0.39	0.63	0.59	0.09	0.72	0.33	0.12	0.31
Tac1-Ctrl	0.63	0.87	0.89	0.8	0.93	0.99	0.84	0.74	0.83	0.83	0.92	0.54	0.78
CCK-Exp	0.21	0.49	0.48	0.49	0.71	0.79	0.82	0.71	0.62	0.61	0.76	0.6	0.74	0.6
CCK-Ctrl	0.67	0.44	0.66	0.42	0.73	0.47	0.8	0.76	0.76	1.12	0.94	0.76	0.95	1	0.88	0.94	1.04	0.81	1.24
GCG-Exp	0.89	0.27	0.26	0.76	0.67	0.91	0.47	0.55	0.69	0.45	0.71	0.88	0.6	0.43	0.59	0.57	0.39	0.68	0.69	0.42	0.7	0.92	0.62
GCG-Ctrl	0.51	0.87	0.53	0.55	0.59	0.78	0.8	0.74	0.6	0.88	1.11	0.71	1.02	0.7	1.12	0.77	0.57	0.51	0.35	0.58	0.8	0.59	0.9	0.72
SST-Exp	0.84	0.63	0.68	0.57	0.97
SST-Ctrl	0.67	0.73	0.44	0.4	0.94
Ghrl-Exp	0.91	0.68	0.61	0.75	0.85	0.77	1.05	1.06	0.6	0.78	0.63
Ghrl-Ctrl	0.92	0.64	0.7	0.8
