# Supplementary material for: Enteroendocrine cell types that drive food reward and aversion
Source: eLife. 2022 Aug 1;11:e74964. doi: 10.7554/eLife.74964 (PMC9363118; doi:10.7554/eLife.74964)
Supplement: Figure 4—source data 2. [file elife-74964-fig4-data2.xlsx]

## Sheet: Figure 4F
					Licks - Day 1 sucrose - each cell is a different mouse
Genotype	Day 1	Day 1	Day 1	Day 1	Day 1	Day 1	Day 1	Day 1	Day 1	Day 1	Day 1	Day 1	Day 1
Control	586	754	816	843	941	976	839	673	327	563	741	743
Fev	974	1136	513	628
Tac1	348	593	273	369	333
CCK	694	323	391	676	829
Gcg	528	403	646	643	596
Sst	782	716	925	825	734	393
					Licks - Day 3 sucrose - each cell is a different mouse
Genotype	Day 3	Day 3	Day 3	Day 3	Day 3	Day 3	Day 3	Day 3	Day 3	Day 3	Day 3	Day 3	Day 3
Control	717	601	872	737	843	716	529	917	931	910	956	741
Fev	4	43	4	7
Tac1	78	17	22	9	6
CCK	331	353	399	284	1180
Gcg	674	510	552	732	923
Sst	983	651	613	786	592	842
