# Supplementary material for: Enteroendocrine cell types that drive food reward and aversion
Source: eLife. 2022 Aug 1;11:e74964. doi: 10.7554/eLife.74964 (PMC9363118; doi:10.7554/eLife.74964)
Supplement: Figure 4—source data 3. [file elife-74964-fig4-data3.xlsx]

## Sheet: FIgure 4G
	Preference index (choice of sucrose, 2 bottle test)
Ctrl	Fev	Tac1	Cck	Gcg	Sst
0.903	0	0.038	0.895	0.903	0.922
0.994	0.022	0.032	0.979	0.925	0.951
0.941	0.07	0	0.907	0.937	0.898
0.966	0	0.01	0.972	0.851	0.934
0.981		0	0.968		0.9
0.955
0.943
0.976
