# Supplementary material for: Enteroendocrine cell types that drive food reward and aversion
Source: eLife. 2022 Aug 1;11:e74964. doi: 10.7554/eLife.74964 (PMC9363118; doi:10.7554/eLife.74964)
Supplement: Figure 4—source data 4. [file elife-74964-fig4-data4.xlsx]

## Sheet: CTP-2Bottle_EEC_All
								Preference Index at Baseline; each cell is a different mouse
Genotype	Baseline	Baseline	Baseline	Baseline	Baseline	Baseline	Baseline	Baseline	Baseline	Baseline	Baseline	Baseline	Baseline	Baseline	Baseline	Baseline
CCK-Exp	0.174	0.386	0.18	0.32	0.351	0.033	0.087	0.105	0.052	0.063
CCK-Ctrl	0.335	0.189	0.155	0.223	0.206	0.397	0.185	0.317	0.201	0.354	0.32	0.235	0.061	0.025	0.188	0.038
Gcg-Exp	0.093	0.122	0.472	0.457	0.422	0.324	0.113	0.109	0.355	0.339	0.19	0.407	0.114	0.266	0.241	0.291
Gcg-Ctrl	0.474	0.354	0.131	0.193	0.445	0.21	0.129	0.398	0.394	0.466	0.473	0.415	0.491	0.397
SST-Exp	0.448	0.347	0.382	0.026	0.5	0.174	0.332
SST-Ctrl	0.203	0.2	0.592	0.442	0.354	0.619
								Preference Index after Training; each cell is a different mouse
Genotype	Test	Test	Test	Test	Test	Test	Test	Test	Test	Test	Test	Test	Test	Test	Test	Test
CCK-Exp	0.513	0.529	0.579	0.614	0.249	0.234	0.559	0.138	0.241	0.312
CCK-Ctrl	0.188	0.212	0.597	0.189	0.388	0.185	0.203	0.146	0.218	0.636	0.34	0.246	0.074	0.106	0.029	0.247
Gcg-Exp	0.497	0.567	0.558	0.455	0.56	0.531	0.25	0.56	0.679	0.553	0.444	0.306	0.188	0.241	0.62	0.521
Gcg-Ctrl	0.14	0.515	0.329	0.262	0.324	0.294	0.118	0.399	0.091	0.626	0.645	0.612	0.444	0.479
SST-Exp	0.588	0.291	0.417	0.293	0.322	0.193	0.273
SST-Ctrl	0.348	0.338	0.736	0.41	0.614	0.242
