# Supplementary material for: Enteroendocrine cell types that drive food reward and aversion
Source: eLife. 2022 Aug 1;11:e74964. doi: 10.7554/eLife.74964 (PMC9363118; doi:10.7554/eLife.74964)
Supplement: Figure 5—figure supplement 1—source data 1. [file elife-74964-fig5-figsupp1-data1.xlsx]

## Sheet: CTA-Fev-Ant_Test Ratio
	Control	Control	Control	Control	Control	Control	Control	Control	Control	Control	Control	Control					Fev-Exp	Fev-Exp	Fev-Exp	Fev-Exp	Fev-Exp	Fev-Exp	Fev-Exp	Fev-Exp
CNO Veh	0.903	0.994	0.941	0.966	0.981	0.955	0.943	0.976									0	0.07	0	0	0.014	0.012	0.036	0.113
CNO Ods	0.915	0.839	0.731	0.913	0.887	0.919	0.897										0.005	0.058	0.031	0.013	0.035
CNO RP	0.878	0.872	0.9	0.889	0.909	0.875	0.746	0.828	0.908	0.792	0.921	0.961					0.044	0.567	0.008	0.136	0.007	0.012
CNO RPOds	0.97	0.896	0.96	0.948	0.975												0.741	0.118	0.719	0.015	0.859

## Sheet: CTA-Fev-Ant_Training Ratio
	Control	Control	Control	Control	Control	Control	Control	Control						Fev-Exp	Fev-Exp	Fev-Exp	Fev-Exp	Fev-Exp	Fev-Exp
CNO Veh	1.22	0.8	1.07	0.87	0.9	0.73	0.63	1.36						0	0.04	0.01	0.01
CNO Ods	1.03	0.9	1.57	1.08	1.59	0.85	0.49							0.16	0.35	0.01	0.48	0.95	0.32
CNO RP	0.77	0.78	1	0.65	1.27	0.67	0.91	0.85						1.19	1.15	0.89	1.03	0.37	0.9
CNO RPOds	1.1	0.645	0.418	1.021	1.024									0.675	0.331	0.8	1.232	0.757

## Sheet: CTA-Tac1-Ant_Training Ratio
	Control	Control	Control	Control	Control	Control	Control	Control				Tac1-Exp	Tac1-Exp	Tac1-Exp	Tac1-Exp	Tac1-Exp
CNO Veh	0.63	1.36	1.85	1.62	1.29	1						0.22	0.03	0.08	0.02	0.02
CNO Ods	2.09	1.02	1.11	0.95	1.93	2.05	0.455	1.32				0.64	0.62	0.012	0.16	0.32
CNO RP	1.21	1.13	1.05	0.78	0.97	1.219	1.287	0.744				2.49	1.87	1.64	0.098	0.056
CNO JNJ	1.427	1.248	1.046	2.174	0.934	1.316	0.996					0.369	0.474	0.074	0.181	1.319
CNO RPOds	0.773	0.61	1.418	0.621	1.038	1.741						0.846	0.981	0.439	1.944	1.243
