# Supplementary material for: Enteroendocrine cell types that drive food reward and aversion
Source: eLife. 2022 Aug 1;11:e74964. doi: 10.7554/eLife.74964 (PMC9363118; doi:10.7554/eLife.74964)
Supplement: Figure 5—source data 1. [file elife-74964-fig5-data1.xlsx]

## Sheet: Tac1-Ods-60min
	Ctrl	Ctrl	Ctrl	Ctrl	Ctrl	Ctrl	Ctrl	Ctrl	Ctrl	Ctrl	Ctrl	Ctrl	Ctrl	Ctrl	Ctrl	Ctrl	Ctrl	Ctrl	Ctrl	Ctrl	Ctrl	Ctrl	Ctrl	Ctrl	Ctrl	Tac1-Exp	Tac1-Exp	Tac1-Exp	Tac1-Exp	Tac1-Exp	Tac1-Exp	Tac1-Exp	Tac1-Exp	Tac1-Exp	Tac1-Exp	Tac1-Exp	Tac1-Exp	Tac1-Exp	Tac1-Exp	Tac1-Exp	Tac1-Exp	Tac1-Exp	Tac1-Exp	Tac1-Exp	Tac1-Exp	Tac1-Exp	Tac1-Exp	Tac1-Exp	Tac1-Exp
Sal Veh	0.88	0.88	1.29	0.62	1.01	0.8	1.05	0.73	0.71	1.14	0.87	0.78														1.24	1	1.25	1.24	1	0.82	0.87	0.68	0.89
Sal Ods	0.44	0.85	1.44	0.83	0.74	0.64	1.1	0.9	0.93	0.89	0.68	0.84														0.95	1.2	0.95	0.87	1.28	0.7	1.1	0.58	1.18
CNO Veh	0.67	1.21	1.19	0.78	1.04	1.02	1.15	1.14	1.5	1.09	1.08	0.91														0.46	0.09	0.09	0.12	0.17	0.73	0.47	0.55	0.41
CNO Ods	0.71	1.03	0.65	0.65	0.54	1.04	1.07	0.98	0.94	1.08	0.98	1.1														0.52	0.69	0.44	0.44	0.78	0.76	0.51	0.76	0.76
[truncated: 1 more columns]

## Sheet: Tac1-RP-60min
	Ctrl	Ctrl	Ctrl	Ctrl	Ctrl	Ctrl	Ctrl	Ctrl	Ctrl	Ctrl	Ctrl	Ctrl	Ctrl													Tac1-Exp	Tac1-Exp	Tac1-Exp	Tac1-Exp	Tac1-Exp	Tac1-Exp	Tac1-Exp	Tac1-Exp	Tac1-Exp	Tac1-Exp
Sal Veh	0.37	0.72	0.46	0.96	1	0.66	0.7	0.92	0.84	0.98	0.75	0.92	1													1.1	0.86	0.53	0.6	0.74	0.66	0.61	0.96	0.64	0.8
Sal RP	0.57	1.1	0.92	0.72	0.48	0.77	1.08	0.88	0.85	1.08	0.61	0.51	0.58													1.06	0.56	0.86	0.17	0.61	0.45	0.45	0.95	0.19	1.2
CNO Veh	0.99	0.84	0.74	0.83	0.83	0.92	0.54	0.78	1.04	0.88	0.71	0.64	0.53													0.09	0.72	0.33	0.12	0.31	0.17	0.17	0.51	0.19	0.23
CNO RP	0.7	0.64	1.02	0.61	0.09	0.38	0.54	0.68	0.47	0.56	0.73	0.46	0.74													0.23	0.25	0.02	0	0	0.07	0	0.07	0	0.08

## Sheet: Tac1-JNJ-60min
	Ctrl	Ctrl	Ctrl	Ctrl	Ctrl	Ctrl	Ctrl	Ctrl	Ctrl	Ctrl	Ctrl	Ctrl	Ctrl													Tac1-Exp	Tac1-Exp	Tac1-Exp	Tac1-Exp	Tac1-Exp	Tac1-Exp	Tac1-Exp	Tac1-Exp	Tac1-Exp	Tac1-Exp
Sal Veh	0.8	0.94	0.83	0.89	1.11	0.64	0.8	0.71	0.77	0.88	1.03	0.65	0.63													0.68	0.91	0.87	0.92	1.34	0.75	0.88	0.74	1.11	0.8
Sal JNJ	0.68	0.74	0.9	0.55	0.99	0.33	0.68	0.69	0.61	0.93	0.67	0.81	0.61													0.9	0.59	0.5	0.87	0.54	0.67	0.83	0.7	0.73	1.2
CNO Veh	0.51	1.06	0.53	0.73	0.7	0.49	1.2	0.96	1.17	0.7	0.58	0.33	0.78													0.12	0.1	0.25	0.1	0.08	0.49	0.24	0.06	0.14	0.23
CNO JNJ	0.31	0.85	0.2	0.64	1.11	0.66	0.93	0.7	0.57	0.78	0.52	0.57	0.78													0.23	0.06	0.51	0.08	0.09	0.74	0.01	0.07	0.07	0.08

## Sheet: Tac1-Dev-60min
	Ctrl	Ctrl	Ctrl	Ctrl	Ctrl	Ctrl	Ctrl	Ctrl	Ctrl	Ctrl	Ctrl	Ctrl	Ctrl													Tac1-Exp	Tac1-Exp	Tac1-Exp	Tac1-Exp	Tac1-Exp	Tac1-Exp	Tac1-Exp	Tac1-Exp	Tac1-Exp	Tac1-Exp
Sal Veh	0.37	0.72	0.46	0.96	1	0.66	0.7	0.92	0.84	0.98	0.75	0.92	1													1.1	0.86	0.53	0.6	0.74	0.66	0.61	0.96	0.64	0.8
Sal Dev	0.55	0.64	0.76	1.02	0.96	0.96	0.56	0.56	0.86	0.66	1.02	0.79	1.3													1	0.6	0.5	0.5	0.47	0.98	0.98	0.68	0.4	0.59
CNO Veh	0.99	0.84	0.74	0.83	0.83	0.92	0.54	0.78	0.48	0.78	0.84	0.9	0.78													0.09	0.72	0.33	0.12	0.31	0.4	0.3	0.4	0.7	0.92
CNO Dev	0.65	0.87	0.91	0.99	0.8	0.56	0.75	1.01	0.53	0.86	1.04	0.42	1.42													0.26	0.49	0.67	0.05	0.4	0.33	0.53	0.15	0.44	0.37

## Sheet: Tac1-Ods-RP-60min
	Ctrl	Ctrl	Ctrl	Ctrl	Ctrl	Ctrl	Ctrl	Ctrl	Ctrl	Ctrl	Ctrl	Ctrl														Tac1-Exp	Tac1-Exp	Tac1-Exp	Tac1-Exp	Tac1-Exp	Tac1-Exp	Tac1-Exp	Tac1-Exp	Tac1-Exp
Sal Veh	0.88	0.88	1.29	0.62	1.01	0.8	1.05	0.73	0.71	1.14	0.87	0.78														1.24	1	1.25	1.24	1	0.82	0.87	0.68	0.89
Sal OdsRP	0.69	0.76	1.52	0.62	1	0.67	1.07	0.78	0.85	1.2	1	0.79														1.16	1.13	1.13	1.14	1.17	0.94	0.8	0.72	0.85
CNO Veh	0.67	1.21	1.19	0.78	1.04	1.02	1.15	1.14	1.5	1.09	1.08	0.91														0.46	0.09	0.09	0.12	0.17	0.73	0.47	0.55	0.41
CNO OdsRP	0.62	0.95	0.81	1	1.14	0.9	1.38	1.04	1.09	1.34	1.19	1.04														0.85	0.85	0.83	0.75	1.12	1.12	0.78	0.46	0.95
