# Supplementary material for: Enteroendocrine cell types that drive food reward and aversion
Source: eLife. 2022 Aug 1;11:e74964. doi: 10.7554/eLife.74964 (PMC9363118; doi:10.7554/eLife.74964)
Supplement: Figure 5—source data 3. [file elife-74964-fig5-data3.xlsx]

## Sheet: Figure 5C
	Control	Control	Control	Control	Control	Control	Control	Control						Tac1-Exp	Tac1-Exp	Tac1-Exp	Tac1-Exp	Tac1-Exp
CNO Veh	0.943	0.976	0.903	0.925	0.937	0.851								0.038	0.032	0	0.01	0
CNO Ods	0.917	0.933	0.883	0.919	0.966	0.968	0.956	0.639						0.01	0.933	0.493	0.746	0.639
CNO RP	0.792	0.921	0.961	0.925	0.934	0.611	0.917	0.663						0.908	0.007	0.149	0.516	0.556
CNO JNJ	0.552	0.905	0.886	0.888	0.869	0.851	0.951							0.079	0.148	0.126	0.166	0.011
CNO RPOds	0.955	0.873	0.977	0.863	0.636	0.939								0.791	0.979	0.802	0.875	0.724
