# Supplementary material for: Enteroendocrine cell types that drive food reward and aversion
Source: eLife. 2022 Aug 1;11:e74964. doi: 10.7554/eLife.74964 (PMC9363118; doi:10.7554/eLife.74964)
Supplement: Figure 5—source data 4. [file elife-74964-fig5-data4.xlsx]

## Sheet: CTP-2Bottle_CCK_JNJ-Ctrl
	Baseline	Baseline	Baseline	Baseline	Baseline	Baseline	Baseline			Test	Test	Test	Test	Test	Test	Test
CCK-Exp JNJ	0.241	0.493	0.263	0.403	0.247					0.376	0.761	0.557	0.706	0.397
CCK-Ctrl JNJ	0.387	0.118	0.514	0.248	0.386	0.297	0.257			0.322	0.398	0.422	0.336	0.584	0.467	0.167

## Sheet: CTP-2Bottle_CCK_Ant-Dev
	Baseline	Baseline	Baseline	Baseline	Baseline	Baseline	Baseline	Baseline	Baseline			Test	Test	Test	Test	Test	Test	Test	Test	Test
CCK-Exp Dev	0.36	0.28	0.1	0.4	0.23	0.507	0.27	0.44	0.36			0.579	0.168	0.081	0.269	0.449	0.841	0.621	0.226	0.379
CCK-Ctrl Dev	0.072	0.374	0.256	0.308								0.177	0.404	0.559	0.464

## Sheet: CTP-2Bottle_CCK_Ant-Ctrl
	Baseline	Baseline	Baseline	Baseline	Baseline			Test	Test	Test	Test	Test
CCK-Exp Veh	0.08	0.03	0.12	0.35	0.08			0.308	0.692	0.593	0.454	0.392
CCK-Ctrl Veh	0.444	0.184	0.194	0.364				0.241	0.155	0.288	0.501
