# Supplementary material for: Enteroendocrine cell types that drive food reward and aversion
Source: eLife. 2022 Aug 1;11:e74964. doi: 10.7554/eLife.74964 (PMC9363118; doi:10.7554/eLife.74964)
Supplement: Figure 6—figure supplement 1—source data 1. [file elife-74964-fig6-figsupp1-data1.xlsx]

## Sheet: CTA-CNO-Afferent_Test-raw
	Water	Water	Water	Water	Water	Water					Sucrose	Sucrose	Sucrose	Sucrose	Sucrose	Sucrose
Ctrl N/A	56	98	55	171							523	1213	825	974
Ctrl Vagotomy	8	5	19	5							675	975	796	942
Ctrl IT-RTX	16	14	41	89	49	164					1156	200	327	516	1255	1077
Tac1 N/A	178	488	841	391	342						7	16	0	4	0
Tac1 Vagotomy	8	28	26	10							12	10	83	19
Tac1 IT-RTX	252	268	265	30	270	250					124	116	26	70	116	177
