# Supplementary material for: Enteroendocrine cell types that drive food reward and aversion
Source: eLife. 2022 Aug 1;11:e74964. doi: 10.7554/eLife.74964 (PMC9363118; doi:10.7554/eLife.74964)
Supplement: Figure 6—source data 1. [file elife-74964-fig6-data1.xlsx]

## Sheet: Tac1-Vagotomy-60min
	Saline	Saline	Saline	Saline	Saline	Saline	Saline				CNO	CNO	CNO	CNO	CNO	CNO	CNO
Ctrl Vagotomy	1716	2371	2098	2520	2790						2134	2335	1870	2107	4383
Tac1 Sham	2883	3409	2333	3057	4226	4697	4757				2030	1701	421	2353	2641	2747	3257
Tac1 Vagotomy	3393	1871	3289	2321	4449						1360	1628	3213	1353	1361

## Sheet: Tac1-Vagotomy-Ratio
Ctrl Vago	Tac1 NA	Tac1 Vago
1.24359	0.704128	0.400825
0.984817	0.498973	0.870123
0.891325	0.180454	0.976893
0.836111	0.769709	0.582938
1.47097	0.624941	0.305911
	0.584841
	0.684675
