# Supplementary material for: Enteroendocrine cell types that drive food reward and aversion
Source: eLife. 2022 Aug 1;11:e74964. doi: 10.7554/eLife.74964 (PMC9363118; doi:10.7554/eLife.74964)
Supplement: Figure 6—source data 2. [file elife-74964-fig6-data2.xlsx]

## Sheet: CCK-Vagotomy-60min
	Saline	Saline	Saline	Saline	Saline	Saline				CNO	CNO	CNO	CNO	CNO	CNO
Ctrl Vagotomy	1954	2400	2456	4546						1597	2551	2599	4431
CCK Sham	3556	3950	3737	3246	4220					2135	2734	2698	2630	3268
CCK Vagotomy	2014	2359	2467	2610	2788	4433				1599	2024	2328	2981	2379	3924

## Sheet: Cck-Vagotomy-Ratio
Ctrl Vago	CCK NA	CCK Vago
0.817298	0.600394	0.793942
1.06292	0.692152	0.857991
1.05822	0.721969	0.943656
0.974703	0.810228	1.14215
	0.774408	0.8533
		0.8852
