# Supplementary material for: Enteroendocrine cell types that drive food reward and aversion
Source: eLife. 2022 Aug 1;11:e74964. doi: 10.7554/eLife.74964 (PMC9363118; doi:10.7554/eLife.74964)
Supplement: Figure 6—source data 3. [file elife-74964-fig6-data3.xlsx]

## Sheet: Tac1-ITRTX-60min
	Saline	Saline	Saline	Saline	Saline	Saline	Saline			CNO	CNO	CNO	CNO	CNO	CNO	CNO
Ctrl ITRTX	0.61	0.95	0.56	0.73	1.19	0.86				0.84	0.97	0.71	0.75	1.17	0.81
Tac1 ITVeh	0.9	0.98	0.85	0.8	0.56	0.73	0.92			0.28	0.36	0.11	0.52	0.23	0.42	0.2
Tac1 ITRTX	0.48	0.91	0.91	0.62	0.5	0.91				0.55	0.8	0.35	0.18	0.5	0.93

## Sheet: Tac1-ITRTX-Ratio
Ctrl RTX	Tac1 NA	Tac1 RTX
1.38	0.31	1.15
1.02	0.37	0.88
1.27	0.13	0.38
1.03	0.65	0.29
0.98	0.41	1
0.94	0.58	1.02
	0.22
