# Supplementary material for: Enteroendocrine cell types that drive food reward and aversion
Source: eLife. 2022 Aug 1;11:e74964. doi: 10.7554/eLife.74964 (PMC9363118; doi:10.7554/eLife.74964)
Supplement: Figure 6—source data 4. [file elife-74964-fig6-data4.xlsx]

## Sheet: CCK-ITRTX-60min
	Saline	Saline	Saline	Saline	Saline	Saline	Saline				CNO	CNO	CNO	CNO	CNO	CNO	CNO
Ctrl ITRTX	0.81	0.86	0.74	0.74	0.82	0.94					0.85	0.85	0.7	0.66	0.94	0.83
CCK ITVeh	0.9	0.8	0.94	0.62	0.81	0.97					0.7	0.62	0.61	0.6	0.67	0.6
CCK ITRTX	0.84	0.68	0.62	0.69	0.59	0.96	1.32				0.57	0.43	0.54	0.54	0.42	0.72	0.88

## Sheet: CCK-ITRTX-Ratio
Ctrl RTX	CCK NA	CCK RTX
1.05	0.78	0.68
0.99	0.78	0.63
0.95	0.65	0.87
0.89	0.97	0.78
1.15	0.83	0.71
0.88	0.62	0.75
		0.67
