# Supplementary material for: Enteroendocrine cell types that drive food reward and aversion
Source: eLife. 2022 Aug 1;11:e74964. doi: 10.7554/eLife.74964 (PMC9363118; doi:10.7554/eLife.74964)
Supplement: Figure 6—source data 5. [file elife-74964-fig6-data5.xlsx]

## Sheet: CTA-CNO-Afferent_Test
	Tac1-Ctrl	Tac1-Ctrl	Tac1-Ctrl	Tac1-Ctrl	Tac1-Ctrl	Tac1-Ctrl				Tac1-Exp	Tac1-Exp	Tac1-Exp	Tac1-Exp	Tac1-Exp	Tac1-Exp	Tac1-Exp
CNO N/A	0.903	0.925	0.937	0.851						0.038	0.032	0	0.01	0
CNO Vagotomy	0.988	0.995	0.977	0.995						0.6	0.263	0.761	0.655
CNO IT-RTX	0.889	0.853	0.962	0.868	0.986	0.935				0.089	0.7	0.61	0.301	0.415	0.33	0.302

## Sheet: CTA-CNO-Afferent_Ratio
	Control	Control	Control	Control	Control	Control	Control	Control			Tac1-Exp	Tac1-Exp	Tac1-Exp	Tac1-Exp	Tac1-Exp	Tac1-Exp	Tac1-Exp
CNO N/A	1.22	0.8	1.07	0.87	0.9	0.73	0.63	1.36			0.22	0.03	0.08	0.02	0.02
CNO Vagotomy	1.481	0.723	0.635	0.314	1.109						0.03	0.231	0.017	0.006	0.154
CNO IT-RTX	0.941	1.053	0.891	1.07	1.419	0.661					0.916	1.614	0.892	0.488	0.297	0.222	0.267
