# Supplementary material for: Enteroendocrine cell types that drive food reward and aversion
Source: eLife. 2022 Aug 1;11:e74964. doi: 10.7554/eLife.74964 (PMC9363118; doi:10.7554/eLife.74964)
Supplement: Figure 6—source data 6. [file elife-74964-fig6-data6.xlsx]

## Sheet: CTP-2Bottle_EEC-sensory_Vagotom
	Baseline	Baseline	Baseline	Baseline	Baseline	Baseline	Baseline	Baseline				Test	Test	Test	Test	Test	Test	Test	Test
CCK-Ctrl Vagotomy	0.39	0.36	0.35	0.48	0.327	0.21						0.56	0.42	0.53	0.44	0.132	0.142
CCK-Exp Vagotomy	0.48	0.47	0.469	0.41	0.46	0.2	0.312	0.425				0.35	0.67	0.598	0.65	0.48	0.53	0.326	0.261

## Sheet: CTP-2Bottle_EEC-sensory_IT-RTX
	Baseline	Baseline	Baseline	Baseline	Baseline	Baseline	Baseline	Baseline	Baseline					Test	Test	Test	Test	Test	Test	Test	Test	Test
CCK-Ctrl RTX	0.273	0.414	0.207	0.26	0.281	0.424	0.346	0.26	0.385					0.568	0.301	0.072	0.32	0.136	0.443	0.512	0.07	0.356
CCK-Exp RTX	0.382	0.259	0.229	0.113	0.035	0.055								0.391	0.572	0.491	0.644	0.24	0.1

## Sheet: CTP-2Bottle_EEC-sensory_Control
	Baseline	Baseline	Baseline	Baseline	Baseline	Baseline	Baseline				Test	Test	Test	Test	Test	Test	Test
CCK-Ctrl N/A	0.335	0.189	0.155	0.223	0.206	0.397	0.235				0.188	0.212	0.597	0.189	0.388	0.185	0.246
CCK-Exp N/A	0.174	0.386	0.18	0.249	0.32						0.513	0.529	0.579	0.527	0.614
