# Supplementary material for: Enteroendocrine cell types that drive food reward and aversion
Source: eLife. 2022 Aug 1;11:e74964. doi: 10.7554/eLife.74964 (PMC9363118; doi:10.7554/eLife.74964)
Supplement: Source data 1. [file elife-74964-data1.xlsx]

## Sheet: Omnibus Tests
Figure	Statistical test	Sources of Variation	DF	F (DFn, DFd)	P value	Summary
Fig. 4C	Two-way repeated measures ANOVA	Factor 1: Genotype	11	F(11,138)=1.508	P=0.135	ns
		Factor 2: Drug	1	F(1,138)=8.392	P=0.0044	**
		Interaction: Factor 1 x Factor 2	11	F(11,138)=5.5157	P<0.0001	****
Fig. 4F	Two-way repeated measures ANOVA	Factor 1: Day	1	F (1, 63) = 16.31	P=0.0001	***
		Factor 2: Genotype	5	F (5, 63) = 3.463	P=0.0079	**
		Interaction: Factor 1 x Factor 2	5	F (5, 63) = 3.382	P=0.0091	**
Fig. 4G	Ordinary one-way ANOVA	Genotype	5	F(5,25)=1168	P<0.0001	****
Fig. 4I	Two-way repeated measures ANOVA	Factor 1: Genotype	5	F(5,63)=3.463	P=0.0079	**
		Factor 2: Day	1	F (1, 63) = 16.31	P=0.0001	***
		Interaction: Factor 1 x Factor 2	5	F (5, 63) = 3.382	P=0.0091	**
Fig. 5A	Tac1 Ods	Factor 1: Genotype	1	F (1, 19) = 14.25	P=0.0013	**
	Two-way repeated measures ANOVA	Factor 2: Drug	3	F (3, 57) = 6.741	P=0.0006	***
		Interaction: Factor 1 x Factor 2	3	F (3, 57) = 19.00	P<0.0001	****
Fig. 5A	Tac1 RP	Factor 1: Genotype	1	F (1, 21) = 34.88	P<0.0001	****
	Two-way repeated measures ANOVA	Factor 2: Drug	3	F (3, 63) = 21.57	P<0.0001	****
		Interaction: Factor 1 x Factor 2	3	F (3, 63) = 8.333	P<0.0001	****
Fig. 5A	Tac1 JNJ	Factor 1: Genotype	1	F (1, 21) = 21.84	P=0.0001	***
	Two-way repeated measures ANOVA	Factor 2: Drug	3	F (3, 63) = 24.65	P<0.0001	****
		Interaction: Factor 1 x Factor 2	3	F (3, 63) = 16.17	P<0.0001	****
Fig. 5A	Tac1 Dev	Factor 1: Genotype	1	F (1, 21) = 23.33	P<0.0001	****
	Two-way repeated measures ANOVA	Factor 2: Drug	3	F (3, 63) = 4.295	P=0.0081	**
		Interaction: Factor 1 x Factor 2	3	F (3, 63) = 5.032	P=0.0034	**
Fig. 5A	Tac1 Ods RP	Factor 1: Genotype	1	F (1, 19) = 8.406	P=0.0092	**
	Two-way repeated measures ANOVA	Factor 2: Drug	3	F (3, 57) = 8.835	P<0.0001	****
		Interaction: Factor 1 x Factor 2	3	F (3, 57) = 21.44	P<0.0001	****
Fig. 5B	CCK - ODS	Factor 1: Genotype	1	F (1, 34) = 2.679	P=0.1109	ns
	Two-way repeated measures ANOVA	Factor 2: Drug	3	F (3, 102) = 4.382	P=0.0061	**
		Interaction: Factor 1 x Factor 2	3	F (3, 102) = 10.11	P<0.0001	****
Fig. 5B	CCK - RP	Factor 1: Genotype	1	F (1, 20) = 14.75	P=0.0010	**
	Two-way repeated measures ANOVA	Factor 2: Drug	3	F (3, 60) = 10.02	P<0.0001	****
		Interaction: Factor 1 x Factor 2	3	F (3, 60) = 2.394	P=0.0772	ns
Fig. 5B	CCK - JNJ	Factor 1: Genotype	1	F (1, 21) = 4.676	P=0.0423	*
	Two-way repeated measures ANOVA	Factor 2: Drug	3	F (3, 63) = 8.661	P<0.0001	****
		Interaction: Factor 1 x Factor 2	3	F (3, 63) = 2.446	P=0.0720	ns
Fig. 5B	CCK - DEV	Factor 1: Genotype	1	F (1, 34) = 1.694	P=0.2018	ns
	Two-way repeated measures ANOVA	Factor 2: Drug	3	F (3, 102) = 24.64	P<0.0001	****
		Interaction: Factor 1 x Factor 2	3	F (3, 102) = 7.190	P=0.0002	***
Fig. 5B	CCK - EX	Factor 1: Genotype	1	F (1, 21) = 4.407	P=0.0481	*
	Two-way repeated measures ANOVA	Factor 2: Drug	3	F (3, 63) = 12.92	P<0.0001	****
		Interaction: Factor 1 x Factor 2	3	F (3, 63) = 5.193	P=0.0029	**
Fig. 5C	Two-way repeated measures ANOVA	Factor 1: Drug	4	F (4, 50) = 10.62	P<0.0001	****
		Factor 2: Genotype	1	F (1, 50) = 117.6	P<0.0001	****
		Interaction: Factor 1 x Factor 2	4	F (4, 50) = 11.15	P<0.0001	****
Fig. 5D	Two-way repeated measures ANOVA	Factor 1: Time	1	F (1, 28) = 22.71	P<0.0001	****
		Factor 2: Treatment	5	F (5, 28) = 0.7891	P=0.5664	ns
		Interaction: Factor 1 x Factor 2	5	F (5, 28) = 2.895	P=0.0314	*
Fig. 5	Ordinary two-way ANOVA	Factor 1: Drug	3	F (3, 48) = 7.941	P=0.0002	***
Supp. 1c		Factor 2: Genotype	1	F (1, 48) = 360.6	P<0.0001	****
		Interaction: Factor 1 x Factor 2	3	F (3, 48) = 6.041	P=0.0014	**
Fig. 5	Ordinary two-way ANOVA	Factor 1: Drug	3	F (3, 41) = 4.308	P=0.0099	***
Supp. 1d		Factor 2: Genotype	1	F (1, 41) = 23.93	P<0.0001	**
		Interaction: Factor 1 x Factor 2	3	F (3, 41) = 8.104	P=0.0002	****
Fig. 5	Ordinary two-way ANOVA	Factor 1: Drug	3	F (3, 41) = 4.308	P=0.0099	**
Supp. 1e		Factor 2: Genotype	1	F (1, 41) = 23.93	P<0.0001	****
		Interaction: Factor 1 x Factor 2	3	F (3, 41) = 8.104	P=0.0002	***
Fig. 5	Ordinary two-way ANOVA	Factor 1: Drug	4	F (4, 50) = 1.392	P=0.2501	ns
Supp. 1f		Factor 2: Genotype	1	F (1, 50) = 17.33	P=0.0001	***
		Interaction: Factor 1 x Factor 2	1	F (4, 50) = 4.480	P=0.0036	**
Fig. 6b	Two-way repeated measures ANOVA	Factor 1: Drug	1	F (1, 14) = 15.03	P=0.0017	**
left		Factor 2: Subject	2	F (2, 14) = 0.7452	P=0.4925	ns
		Interaction: Factor 1 x Factor 2	2	F (2, 14) = 6.480	P=0.0102	*
Fig. 6b	Ordinary one-way ANOVA	Treatment genotype	2	F (2, 14) = 6.926	P=0.0081	**
right
Fig. 6c	Two-way repeated measures ANOVA	Factor 1: Drug	1	F (1, 12) = 32.50	P<0.0001	****
left		Factor 2: Subject	2	F (2, 12) = 0.6638	P=0.5328	ns
		Interaction: Factor 1 x Factor 2	2	F (2, 12) = 15.33	P=0.0005	***
Fig. 6c	Ordinary one-way ANOVA	Treatment genotype	2	F (2, 12) = 7.267	P=0.0086	**
right
Fig. 6d	Two-way repeated measures ANOVA	Factor 1: Drug	1	F (1, 16) = 20.25	P=0.0004	***
left		Factor 2: Subject	2	F (2, 16) = 4.673	P=0.0252	*
		Interaction: Factor 1 x Factor 2	2	F (2, 16) = 13.38	P=0.0004	***
Fig. 6d	Ordinary one-way ANOVA	Treatment genotype	2	F (2, 16) = 13.40	P=0.0004	***
right
Fig. 6e	Two-way repeated measures ANOVA	Factor 1: Drug	1	F (1, 16) = 34.54	P<0.0001	****
left		Factor 2: Subject	2	F (2, 16) = 1.036	P=0.3774	ns
		Interaction: Factor 1 x Factor 2	2	F (2, 16) = 7.123	P=0.0061	**
Fig. 6e	Ordinary one-way ANOVA	Treatment genotype	2	F (2, 16) = 11.03	P=0.0010	***
right
Fig. 6f	Ordinary two-way ANOVA	Factor 1: Genotype	1	F (1, 24) = 154.1	P<0.0001	****
left		Factor 2: Treatment	2	F (2, 24) = 12.83	P=0.0002	***
		Interaction: Factor 1 x Factor 2	2	F (2, 24) = 7.792	P=0.0025	**
Fig. 6f	Ordinary two-way ANOVA	Factor 1: Genotype	1	F (1, 30) = 35.61	P<0.0001	****
right		Factor 2: Treatment	2	F (2, 30) = 4.673	P=0.0171	*
		Interaction: Factor 1 x Factor 2	2	F (2, 30) = 2.398	P=0.1081	ns
Fig. 6g	Two-way repeated measures ANOVA	Factor 1: Genotype	1	F (1, 10) = 16.95	P=0.0021	*
Control		Factor 2: Before:After	1	F (1, 10) = 9.746	P=0.0108	**
		Interaction: Factor 1 x Factor 2	1	F (1, 10) = 5.771	P=0.0372	*
Fig. 6g	Two-way repeated measures ANOVA	Factor 1: Genotype	1	F (1, 12) = 1.866	P=0.1970	ns
Vagotomy		Factor 2: Before:After	1	F (1, 12) = 1.213	P=0.2923	ns
		Interaction: Factor 1 x Factor 2	1	F (1, 12) = 0.4892	P=0.4976	ns
Fig. 6g	Two-way repeated measures ANOVA	Factor 1: Genotype	1	F (1, 13) = 0.08803	P=0.7714	ns
IT-RTX		Factor 2: Before:After	1	F (1, 13) = 5.795	P=0.0316	*
		Interaction: Factor 1 x Factor 2	1	F (1, 13) = 6.671	P=0.0227	*

## Sheet: Post-Hoc Tests
Figure Panel	Subgroup	Comparison	N1	N2	t (Sidak), q (Tukey)	DF	Test	Adjusted P-value	Summary
Figure 4C	Fev-Exp	Saline-CNO	9	9	3.065	138	two-way repeated measures ANOVA followed by Sidak test	0.031	*
Figure 4C	Fev-Ctrl	Saline-CNO	13	13	0.6058	138	two-way repeated measures ANOVA followed by Sidak test	>0.9999	ns
Figure 4C	Tac1-Exp	Saline-CNO	10	10	5.252	138	two-way repeated measures ANOVA followed by Sidak test	<0.0001	****
Figure 4C	Tac1-Ctrl	Saline-CNO	13	13	1.775	138	two-way repeated measures ANOVA followed by Sidak test	0.6231	ns
Figure 4C	CCK-Exp	Saline-CNO	14	14	3.312	138	two-way repeated measures ANOVA followed by Sidak test	0.0141	*
Figure 4C	CCK-Ctrl	Saline-CNO	19	19	1.259	138	two-way repeated measures ANOVA followed by Sidak test	0.9412	ns
Figure 4C	GCG-Exp	Saline-CNO	23	23	3.156	138	two-way repeated measures ANOVA followed by Sidak test	0.0233	*
Figure 4C	GCG-Ctrl	Saline-CNO	24	24	0.7258	138	two-way repeated measures ANOVA followed by Sidak test	0.9995	ns
Figure 4C	SST-Exp	Saline-CNO	5	5	0.4316	138	two-way repeated measures ANOVA followed by Sidak test	>0.9999	ns
Figure 4C	SST-Ctrl	Saline-CNO	5	5	0.9541	138	two-way repeated measures ANOVA followed by Sidak test	0.9934	ns
Figure 4C	Ghrl-Exp	Saline-CNO	11	11	1.164	138	two-way repeated measures ANOVA followed by Sidak test	0.9665	ns
Figure 4C	Ghrl-Ctrl	Saline-CNO	4	4	0.05079	138	two-way repeated measures ANOVA followed by Sidak test	>0.9999	ns
Figure 4F	Control	1st vs. 2nd	12	12	0.7752	31	two-way repeated measures ANOVA followed by Sidak test	0.9705	ns
Figure 4F	Fev	1st vs. 2nd	4	4	6.418	31	two-way repeated measures ANOVA followed by Sidak test	<0.0001	****
Figure 4F	Tac1	1st vs. 2nd	5	5	3.207	31	two-way repeated measures ANOVA followed by Sidak test	0.0185	*
Figure 4F	Cck	1st vs. 2nd	5	5	0.658	31	two-way repeated measures ANOVA followed by Sidak test	0.987	ns
Figure 4F	Gcg	1st vs. 2nd	5	5	1.034	31	two-way repeated measures ANOVA followed by Sidak test	0.8914	ns
Figure 4F	Sst	1st vs. 2nd	6	6	0.151	31	two-way repeated measures ANOVA followed by Sidak test	>0.9999	ns
Figure 4G	Fev	Control	4	8	71.07	25	ordinary one-way ANOVA followed by Tukey test	<0.0001	****
Figure 4G	Tac1	Control	5	8	76.91	25	ordinary one-way ANOVA followed by Tukey test	<0.0001	****
Figure 4G	Cck	Control	5	8	1.076	25	ordinary one-way ANOVA followed by Tukey test	0.9716	ns
Figure 4G	Gcg	Control	4	8	4.06	25	ordinary one-way ANOVA followed by Tukey test	0.0783	ns
Figure 4G	Sst	Control	5	8	2.972	25	ordinary one-way ANOVA followed by Tukey test	0.3186	ns
Figure 4I	CCK-Exp	Baseline-Test	10	10	4	63	two-way repeated measures ANOVA followed by Sidak test	0.001	**
Figure 4I	CCK-Ctrl	Baseline-Test	16	16	0.8202	63	two-way repeated measures ANOVA followed by Sidak test	0.96	ns
Figure 4I	GCG-Exp	Baseline-Test	16	16	4.586	63	two-way repeated measures ANOVA followed by Sidak test	0.0001	***
Figure 4I	GCG-Ctrl	Baseline-Test	14	14	0.4697	63	two-way repeated measures ANOVA followed by Sidak test	0.9978	ns
Figure 4I	SST-Exp	Baseline-Test	7	7	0.3623	63	two-way repeated measures ANOVA followed by Sidak test	0.9995	ns
Figure 4I	SST-Ctrl	Baseline-Test	6	6	0.6476	63	two-way repeated measures ANOVA followed by Sidak test	0.9877	ns
Figure 5A - Tac1-Ods
Figure 5A	Tac1-Exp	Sal Veh vs. Sal Ods	9	9	0.2057	57	two-way repeated measures ANOVA followed by Sidak test	>0.9999	ns
Figure 5A	Tac1-Exp	Sal Veh vs. CNO Veh	9	9	6.741	57	two-way repeated measures ANOVA followed by Sidak test	<0.0001	****
Figure 5A	Tac1-Exp	Sal Veh vs. CNO Ods	9	9	3.805	57	two-way repeated measures ANOVA followed by Sidak test	0.0021	**
Figure 5A	Tac1-Exp	Sal Ods vs. CNO Veh	9	9	6.536	57	two-way repeated measures ANOVA followed by Sidak test	<0.0001	****
Figure 5A	Tac1-Exp	Sal Ods vs. CNO Ods	9	9	3.599	57	two-way repeated measures ANOVA followed by Sidak test	0.004	**
Figure 5A	Tac1-Exp	CNO Veh vs. CNO Ods	9	9	2.936	57	two-way repeated measures ANOVA followed by Sidak test	0.0283	*
Figure 5A - Tac1-RP
Figure 5A	Tac1-Exp	Sal Veh vs. Sal RP	10	10	1.096	63	two-way repeated measures ANOVA followed by Sidak test	0.8575	ns
Figure 5A	Tac1-Exp	Sal Veh vs. CNO Veh	10	10	5.107	63	two-way repeated measures ANOVA followed by Sidak test	<0.0001	****
Figure 5A	Tac1-Exp	Sal Veh vs. CNO RP	10	10	7.43	63	two-way repeated measures ANOVA followed by Sidak test	<0.0001	****
Figure 5A	Tac1-Exp	Sal RP vs. CNO Veh	10	10	4.011	63	two-way repeated measures ANOVA followed by Sidak test	0.001	***
Figure 5A	Tac1-Exp	Sal RP vs. CNO RP	10	10	6.334	63	two-way repeated measures ANOVA followed by Sidak test	<0.0001	****
Figure 5A	Tac1-Exp	CNO Veh vs. CNO RP	10	10	2.323	63	two-way repeated measures ANOVA followed by Sidak test	0.1325	ns
Figure 5A - Tac1-JNJ
Figure 5A	Tac1-Exp	Sal Veh vs. Sal JNJ	10	10	1.644	63	two-way repeated measures ANOVA followed by Sidak test	0.4863	ns
Figure 5A	Tac1-Exp	Sal Veh vs. CNO Veh	10	10	8.043	63	two-way repeated measures ANOVA followed by Sidak test	<0.0001	****
Figure 5A	Tac1-Exp	Sal Veh vs. CNO JNJ	10	10	7.897	63	two-way repeated measures ANOVA followed by Sidak test	<0.0001	****
Figure 5A	Tac1-Exp	Sal JNJ vs. CNO Veh	10	10	6.398	63	two-way repeated measures ANOVA followed by Sidak test	<0.0001	****
Figure 5A	Tac1-Exp	Sal JNJ vs. CNO JNJ	10	10	6.253	63	two-way repeated measures ANOVA followed by Sidak test	<0.0001	****
Figure 5A	Tac1-Exp	CNO Veh vs. CNO JNJ	10	10	0.1454	63	two-way repeated measures ANOVA followed by Sidak test	>0.9999	ns
Figure 5A - Tac1-Dev
Figure 5A	Tac1-Exp	Sal Veh vs. Sal Dev	10	10	0.8767	63	two-way repeated measures ANOVA followed by Sidak test	0.9454	ns
Figure 5A	Tac1-Exp	Sal Veh vs. CNO Veh	10	10	3.518	63	two-way repeated measures ANOVA followed by Sidak test	0.0049	**
Figure 5A	Tac1-Exp	Sal Veh vs. CNO Dev	10	10	4.175	63	two-way repeated measures ANOVA followed by Sidak test	0.0006	***
Figure 5A	Tac1-Exp	Sal Dev vs. CNO Veh	10	10	2.641	63	two-way repeated measures ANOVA followed by Sidak test	0.0609	ns
Figure 5A	Tac1-Exp	Sal Dev vs. CNO Dev	10	10	3.298	63	two-way repeated measures ANOVA followed by Sidak test	0.0096	**
Figure 5A	Tac1-Exp	CNO Veh vs. CNO Dev	10	10	0.6575	63	two-way repeated measures ANOVA followed by Sidak test	0.9867	ns
Figure 5A - Tac1-Ods RP
Figure 5A	Tac1-Exp	Sal Veh vs. Sal OdsRP	9	9	0.06233	57	two-way repeated measures ANOVA followed by Sidak test	>0.9999	ns
Figure 5A	Tac1-Exp	Sal Veh vs. CNO Veh	9	9	7.355	57	two-way repeated measures ANOVA followed by Sidak test	<0.0001	****
Figure 5A	Tac1-Exp	Sal Veh vs. CNO OdsRP	9	9	1.596	57	two-way repeated measures ANOVA followed by Sidak test	0.5231	ns
Figure 5A	Tac1-Exp	Sal OdsRP vs. CNO Veh	9	9	7.417	57	two-way repeated measures ANOVA followed by Sidak test	<0.0001	****
Figure 5A	Tac1-Exp	Sal OdsRP vs. CNO OdsRP	9	9	1.658	57	two-way repeated measures ANOVA followed by Sidak test	0.4784	ns
Figure 5A	Tac1-Exp	CNO Veh vs. CNO OdsRP	9	9	5.759	57	two-way repeated measures ANOVA followed by Sidak test	<0.0001	****
Figure 5A - CCK-Ods
Figure 5B	Cck-Exp	Sal Veh vs. Sal Ods	16	16	0.2092	102	two-way repeated measures ANOVA followed by Sidak test	>0.9999	ns
Figure 5B	Cck-Exp	Sal Veh vs. CNO Veh	16	16	4.055	102	two-way repeated measures ANOVA followed by Sidak test	0.0006	***
Figure 5B	Cck-Exp	Sal Veh vs. CNO Ods	16	16	4.364	102	two-way repeated measures ANOVA followed by Sidak test	0.0002	***
Figure 5B	Cck-Exp	Sal Ods vs. CNO Veh	16	16	4.264	102	two-way repeated measures ANOVA followed by Sidak test	0.0003	***
Figure 5B	Cck-Exp	Sal Ods vs. CNO Ods	16	16	4.573	102	two-way repeated measures ANOVA followed by Sidak test	<0.0001	****
Figure 5B	Cck-Exp	CNO Veh vs. CNO Ods	16	16	0.3088	102	two-way repeated measures ANOVA followed by Sidak test	0.9998	ns
Figure 5B - CCK-RP
Figure 5B	Cck-Exp	Sal Veh vs. Sal RP	10	10	1.865	60	two-way repeated measures ANOVA followed by Sidak test	0.3409	ns
Figure 5B	Cck-Exp	Sal Veh vs. CNO Veh	10	10	3.078	60	two-way repeated measures ANOVA followed by Sidak test	0.0187	*
Figure 5B	Cck-Exp	Sal Veh vs. CNO RP	10	10	4.667	60	two-way repeated measures ANOVA followed by Sidak test	0.0001	***
Figure 5B	Cck-Exp	Sal RP vs. CNO Veh	10	10	1.214	60	two-way repeated measures ANOVA followed by Sidak test	0.791	ns
Figure 5B	Cck-Exp	Sal RP vs. CNO RP	10	10	2.802	60	two-way repeated measures ANOVA followed by Sidak test	0.0402	*
Figure 5B	Cck-Exp	CNO Veh vs. CNO RP	10	10	1.589	60	two-way repeated measures ANOVA followed by Sidak test	0.5272	ns
Figure 5B - CCK-JNJ
Figure 5B	Cck-Exp	Sal Veh vs. Sal JNJ	11	11	1.965	63	two-way repeated measures ANOVA followed by Sidak test	0.2824	ns
Figure 5B	Cck-Exp	Sal Veh vs. CNO Veh	11	11	5.256	63	two-way repeated measures ANOVA followed by Sidak test	<0.0001	****
Figure 5B	Cck-Exp	Sal Veh vs. CNO JNJ	11	11	1.942	63	two-way repeated measures ANOVA followed by Sidak test	0.2951	ns
Figure 5B	Cck-Exp	Sal JNJ vs. CNO Veh	11	11	3.291	63	two-way repeated measures ANOVA followed by Sidak test	0.0098	**
Figure 5B	Cck-Exp	Sal JNJ vs. CNO JNJ	11	11	0.02326	63	two-way repeated measures ANOVA followed by Sidak test	>0.9999	ns
Figure 5B	Cck-Exp	CNO Veh vs. CNO JNJ	11	11	3.314	63	two-way repeated measures ANOVA followed by Sidak test	0.0091	**
Figure 5B - CCK-DEV
Figure 5B	Cck-Exp	Sal Veh vs. Sal Dev	16	16	3.669	102	two-way repeated measures ANOVA followed by Sidak test	0.0023	**
Figure 5B	Cck-Exp	Sal Veh vs. CNO Veh	16	16	4.172	102	two-way repeated measures ANOVA followed by Sidak test	0.0004	***
Figure 5B	Cck-Exp	Sal Veh vs. CNO Dev	16	16	0.5535	102	two-way repeated measures ANOVA followed by Sidak test	0.9946	ns
Figure 5B	Cck-Exp	Sal Dev vs. CNO Veh	16	16	7.841	102	two-way repeated measures ANOVA followed by Sidak test	<0.0001	****
Figure 5B	Cck-Exp	Sal Dev vs. CNO Dev	16	16	3.116	102	two-way repeated measures ANOVA followed by Sidak test	0.0142	*
Figure 5B	Cck-Exp	CNO Veh vs. CNO Dev	16	16	4.725	102	two-way repeated measures ANOVA followed by Sidak test	<0.0001	****
Figure 5B - CCK-Ex
Figure 5B	Cck-Exp	Sal Veh vs. Sal JNJ	11	11	0.05976	63	two-way repeated measures ANOVA followed by Sidak test	>0.9999	ns
Figure 5B	Cck-Exp	Sal Veh vs. CNO Veh	11	11	5.767	63	two-way repeated measures ANOVA followed by Sidak test	<0.0001	****
Figure 5B	Cck-Exp	Sal Veh vs. CNO JNJ	11	11	3.257	63	two-way repeated measures ANOVA followed by Sidak test	0.0108	*
Figure 5B	Cck-Exp	Sal JNJ vs. CNO Veh	11	11	5.826	63	two-way repeated measures ANOVA followed by Sidak test	<0.0001	****
Figure 5B	Cck-Exp	Sal JNJ vs. CNO JNJ	11	11	3.317	63	two-way repeated measures ANOVA followed by Sidak test	0.0091	**
Figure 5B	Cck-Exp	CNO Veh vs. CNO JNJ	11	11	2.51	63	two-way repeated measures ANOVA followed by Sidak test	0.0848	ns
Figure 5C	CNO Veh	Control vs. Tac1-Exp	6	5	8.778	50	two-way repeated measures ANOVA followed by Sidak test	<0.0001	****
Figure 5C	CNO Ods	Control vs. Tac1-Exp	8	5	3.429	50	two-way repeated measures ANOVA followed by Sidak test	0.0061	**
Figure 5C	CNO RP	Control vs. Tac1-Exp	8	5	4.251	50	two-way repeated measures ANOVA followed by Sidak test	0.0005	***
Figure 5C	CNO JNJ	Control vs. Tac1-Exp	7	5	7.381	50	two-way repeated measures ANOVA followed by Sidak test	<0.0001	****
Figure 5C	CNO RPOds	Control vs. Tac1-Exp	6	5	0.3838	50	two-way repeated measures ANOVA followed by Sidak test	0.9977	ns
Figure 5D	CCK-Exp Veh	Before-After	5	5	4.639	28	two-way repeated measures ANOVA followed by Sidak test	0.0004	**
Figure 5D	CCK-Exp Dev	Before-After	9	9	1.295	28	two-way repeated measures ANOVA followed by Sidak test	0.7495	ns
Figure 5D	CCK-Exp JNJ	Before-After	5	5	2.999	28	two-way repeated measures ANOVA followed by Sidak test	0.0333	ns
Figure 5D	CCK-Ctrl Veh	Before-After	4	4	0.002916	28	two-way repeated measures ANOVA followed by Sidak test	>0.9999	ns
Figure 5D	CCK-Ctrl Dev	Before-After	4	4	1.732	28	two-way repeated measures ANOVA followed by Sidak test	0.448	**
Figure 5D	CCK-Ctrl JNJ	Before-After	7	7	1.078	28	two-way repeated measures ANOVA followed by Sidak test	0.8723	ns
Figure 5 - FIgure Supplement 1C	CNO Veh	Control vs. Fev-Exp	8	8	13.2	48	ordinary two-way ANOVA followed by Sidak test	<0.0001	****
Figure 5 - FIgure Supplement 1C	CNO Ods	Control vs. Fev-Exp	7	5	10.25	48	ordinary two-way ANOVA followed by Sidak test	<0.0001	****
Figure 5 - FIgure Supplement 1C	CNO RP	Control vs. Fev-Exp	12	6	10.6	48	ordinary two-way ANOVA followed by Sidak test	<0.0001	****
Figure 5 - FIgure Supplement 1C	CNO RPOds	Control vs. Fev-Exp	5	5	5.171	48	ordinary two-way ANOVA followed by Sidak test	<0.0001	****
Figure 5 - FIgure Supplement 1D	CNO Veh	Control vs. Fev-Exp	8	4	5.295	41	ordinary two-way ANOVA followed by Sidak test	<0.0001	****
Figure 5 - FIgure Supplement 1D	CNO Ods	Control vs. Fev-Exp	7	6	4.34	41	ordinary two-way ANOVA followed by Sidak test	0.0004	***
Figure 5 - FIgure Supplement 1D	CNO RP	Control vs. Fev-Exp	8	6	0.3809	41	ordinary two-way ANOVA followed by Sidak test	0.9925	ns
Figure 5 - FIgure Supplement 1D	CNO RPOds	Control vs. Fev-Exp	5	5	0.4541	41	ordinary two-way ANOVA followed by Sidak test	0.9854	ns
Figure 5 - FIgure Supplement 1E	CNO Veh	Control vs. Tac1-Exp	6	5	3.905	50	ordinary two-way ANOVA followed by Sidak test	0.0014	**
Figure 5 - FIgure Supplement 1E	CNO Ods	Control vs. Tac1-Exp	8	5	3.458	50	ordinary two-way ANOVA followed by Sidak test	0.0056	**
Figure 5 - FIgure Supplement 1E	CNO RP	Control vs. Tac1-Exp	8	5	0.6202	50	ordinary two-way ANOVA followed by Sidak test	0.9789	ns
Figure 5 - FIgure Supplement 1E	CNO JNJ	Control vs. Tac1-Exp	7	5	2.728	50	ordinary two-way ANOVA followed by Sidak test	0.0431	*
Figure 5 - FIgure Supplement 1E	CNO RPOds	Control vs. Tac1-Exp	6	5	0.1831	50	ordinary two-way ANOVA followed by Sidak test	>0.9999	ns
Figure 6B - left	Ctrl Vagotomy	Veh. vs. CNO	5	5	0.6888	14	two-way repeated measures ANOVA followed by Sidak test	0.8766	ns
Figure 6B - left	Tac1 Sham	Veh. vs. CNO	7	7	4.457	14	two-way repeated measures ANOVA followed by Sidak test	0.0016	**
Figure 6B - left	Tac1 Vagotomy	Veh. vs. CNO	5	5	3.309	14	two-way repeated measures ANOVA followed by Sidak test	0.0154	*
Figure 6B - right	Ctrl Vago	Tac1 Sham	5	7	4.965	14	ordinary one-way ANOVA followed by Tukey test	0.0091	**
Figure 6B - right	Ctrl Vago	Tac1 Vago	5	5	4.152	14	ordinary one-way ANOVA followed by Tukey test	0.0275	*
Figure 6B - right	Tac1 Sham	Tac1 Vago	7	5	0.4807	14	ordinary one-way ANOVA followed by Tukey test	0.9386	ns
Figure 6C - left	Ctrl Vagotomy	Veh. vs. CNO	4	4	0.299	12	two-way repeated measures ANOVA followed by Sidak test	0.9878	ns
Figure 6C - left	CCK Sham	Veh. vs. CNO	5	5	7.878	12	two-way repeated measures ANOVA followed by Sidak test	<0.0001	****
Figure 6C - left	CCK Vagotomy	Veh. vs. CNO	6	6	1.969	12	two-way repeated measures ANOVA followed by Sidak test	0.2019	ns
Figure 6C - right	Ctrl Vago	CCK sham	4	5	5.033	12	ordinary one-way ANOVA followed by Tukey test	0.0102	*
Figure 6C - right	Ctrl Vago	CCK Vago	4	6	1.327	12	ordinary one-way ANOVA followed by Tukey test	0.6275	ns
Figure 6C - right	CCK sham	CCK Vago	5	6	4.161	12	ordinary one-way ANOVA followed by Tukey test	0.0307	*
Figure 6D - left	Ctrl RTX	Veh. vs. CNO	6	6	0.7057	16	two-way repeated measures ANOVA followed by Sidak test	0.8678	ns
Figure 6D - left	Tac1 Veh	Veh. vs. CNO	7	7	6.757	16	two-way repeated measures ANOVA followed by Sidak test	<0.0001	****
Figure 6D - left	Tac1 RTX	Veh. vs. CNO	6	6	2.056	16	two-way repeated measures ANOVA followed by Sidak test	0.1599	ns
Figure 6D - right	Ctrl RTX	Tac1 Sham	6	7	7.274	16	ordinary one-way ANOVA followed by Tukey test	0.0003	***
Figure 6D - right	Ctrl RTX	Tac1 RTX	6	6	3.075	16	ordinary one-way ANOVA followed by Tukey test	0.1064	ns
Figure 6D - right	Tac1 Sham	Tac1 RTX	7	6	4.083	16	ordinary one-way ANOVA followed by Tukey test	0.0274	*
Figure 6E - left	Ctrl RTX	Veh. vs. CNO	6	6	0.2953	16	two-way repeated measures ANOVA followed by Sidak test	0.9881	ns
Figure 6E - left	CCK Sham	Veh. vs. CNO	6	6	4.577	16	two-way repeated measures ANOVA followed by Sidak test	0.0009	***
Figure 6E - left	CCK RTX	Veh. vs. CNO	7	7	5.467	16	two-way repeated measures ANOVA followed by Sidak test	0.0002	***
Figure 6E - right	Ctrl RTX	CCK Sham	6	6	5.034	16	ordinary one-way ANOVA followed by Tukey test	0.007	**
Figure 6E - right	Ctrl RTX	CCK RTX	6	7	6.315	16	ordinary one-way ANOVA followed by Tukey test	0.0011	**
Figure 6E - right	CCK Sham	CCK RTX	6	7	1.09	16	ordinary one-way ANOVA followed by Tukey test	0.7256	ns
Figure 6F - left	Sham	Tac1-Ctrl - Tac1-Exp	4	5	10.08	24	two-way repeated measures ANOVA followed by Sidak test	<0.0001	****
Figure 6F - left	Vagotomy	Tac1-Ctrl - Tac1-Exp	4	4	4.511	24	two-way repeated measures ANOVA followed by Sidak test	0.0004	***
Figure 6F - left	RTX	Tac1-Ctrl - Tac1-Exp	6	7	7.158	24	two-way repeated measures ANOVA followed by Sidak test	<0.0001	****
Figure 6F - right	Sham	Tac1-Ctrl - Tac1-Exp	8	5	4.713	30	two-way repeated measures ANOVA followed by Sidak test	0.0002	***
Figure 6F - right	Vagotomy	Tac1-Ctrl - Tac1-Exp	5	5	3.719	30	two-way repeated measures ANOVA followed by Sidak test	0.0025	**
Figure 6F - right	RTX	Tac1-Ctrl - Tac1-Exp	6	7	1.852	30	two-way repeated measures ANOVA followed by Sidak test	0.2057	ns
Figure 6G	CCK-Ctrl - Sham	Before-After	7	7	0.5574	10	two-way repeated measures ANOVA followed by Sidak test	0.8315	ns
Figure 6G	CCK-Exp - Sham	Before-After	5	5	3.616	10	two-way repeated measures ANOVA followed by Sidak test	0.0094	**
Figure 6G	CCK-Ctrl - Vago	Before-After	6	6	0.266	12	two-way repeated measures ANOVA followed by Sidak test	0.9579	ns
Figure 6G	CCK-Exp - Vago	Before-After	8	8	1.375	12	two-way repeated measures ANOVA followed by Sidak test	0.3506	ns
Figure 6G	CCK-Ctrl - RTX	Before-After	9	9	0.1387	13	two-way repeated measures ANOVA followed by Sidak test	0.9883	ns
Figure 6G	CCK-Exp - RTX	Before-After	6	6	3.221	13	two-way repeated measures ANOVA followed by Sidak test	0.0133	*
